# Supplementary material for: Entamoeba histolytica: In Silico and In Vitro Oligomerization of EhHSTF5 Enhances Its Binding to the HSE of the EhPgp5 Gene Promoter
Source: Preprints.org preprint supplement (doi:10.20944/preprints202403.0666.v1), 2024-03-12
Supplement: Supplementary file 2 [file supplementary]

Archive with 5 entries (5 files):
- Figures (1 to 3) and Supplementary Table 1.pdf
- Supplementary Figure 1.png
- Supplementary Figure 2.png
- Supplementary Figure 3.png
- Supplementary Table 1.jpg
