# Supplementary figures and images for: Entamoeba histolytica: In Silico and In Vitro Oligomerization of EhHSTF5 Enhances Its Binding to the HSE of the EhPgp5 Gene Promoter
Source: Preprints.org preprint supplement (doi:10.20944/preprints202403.0666.v1), 2024-03-12

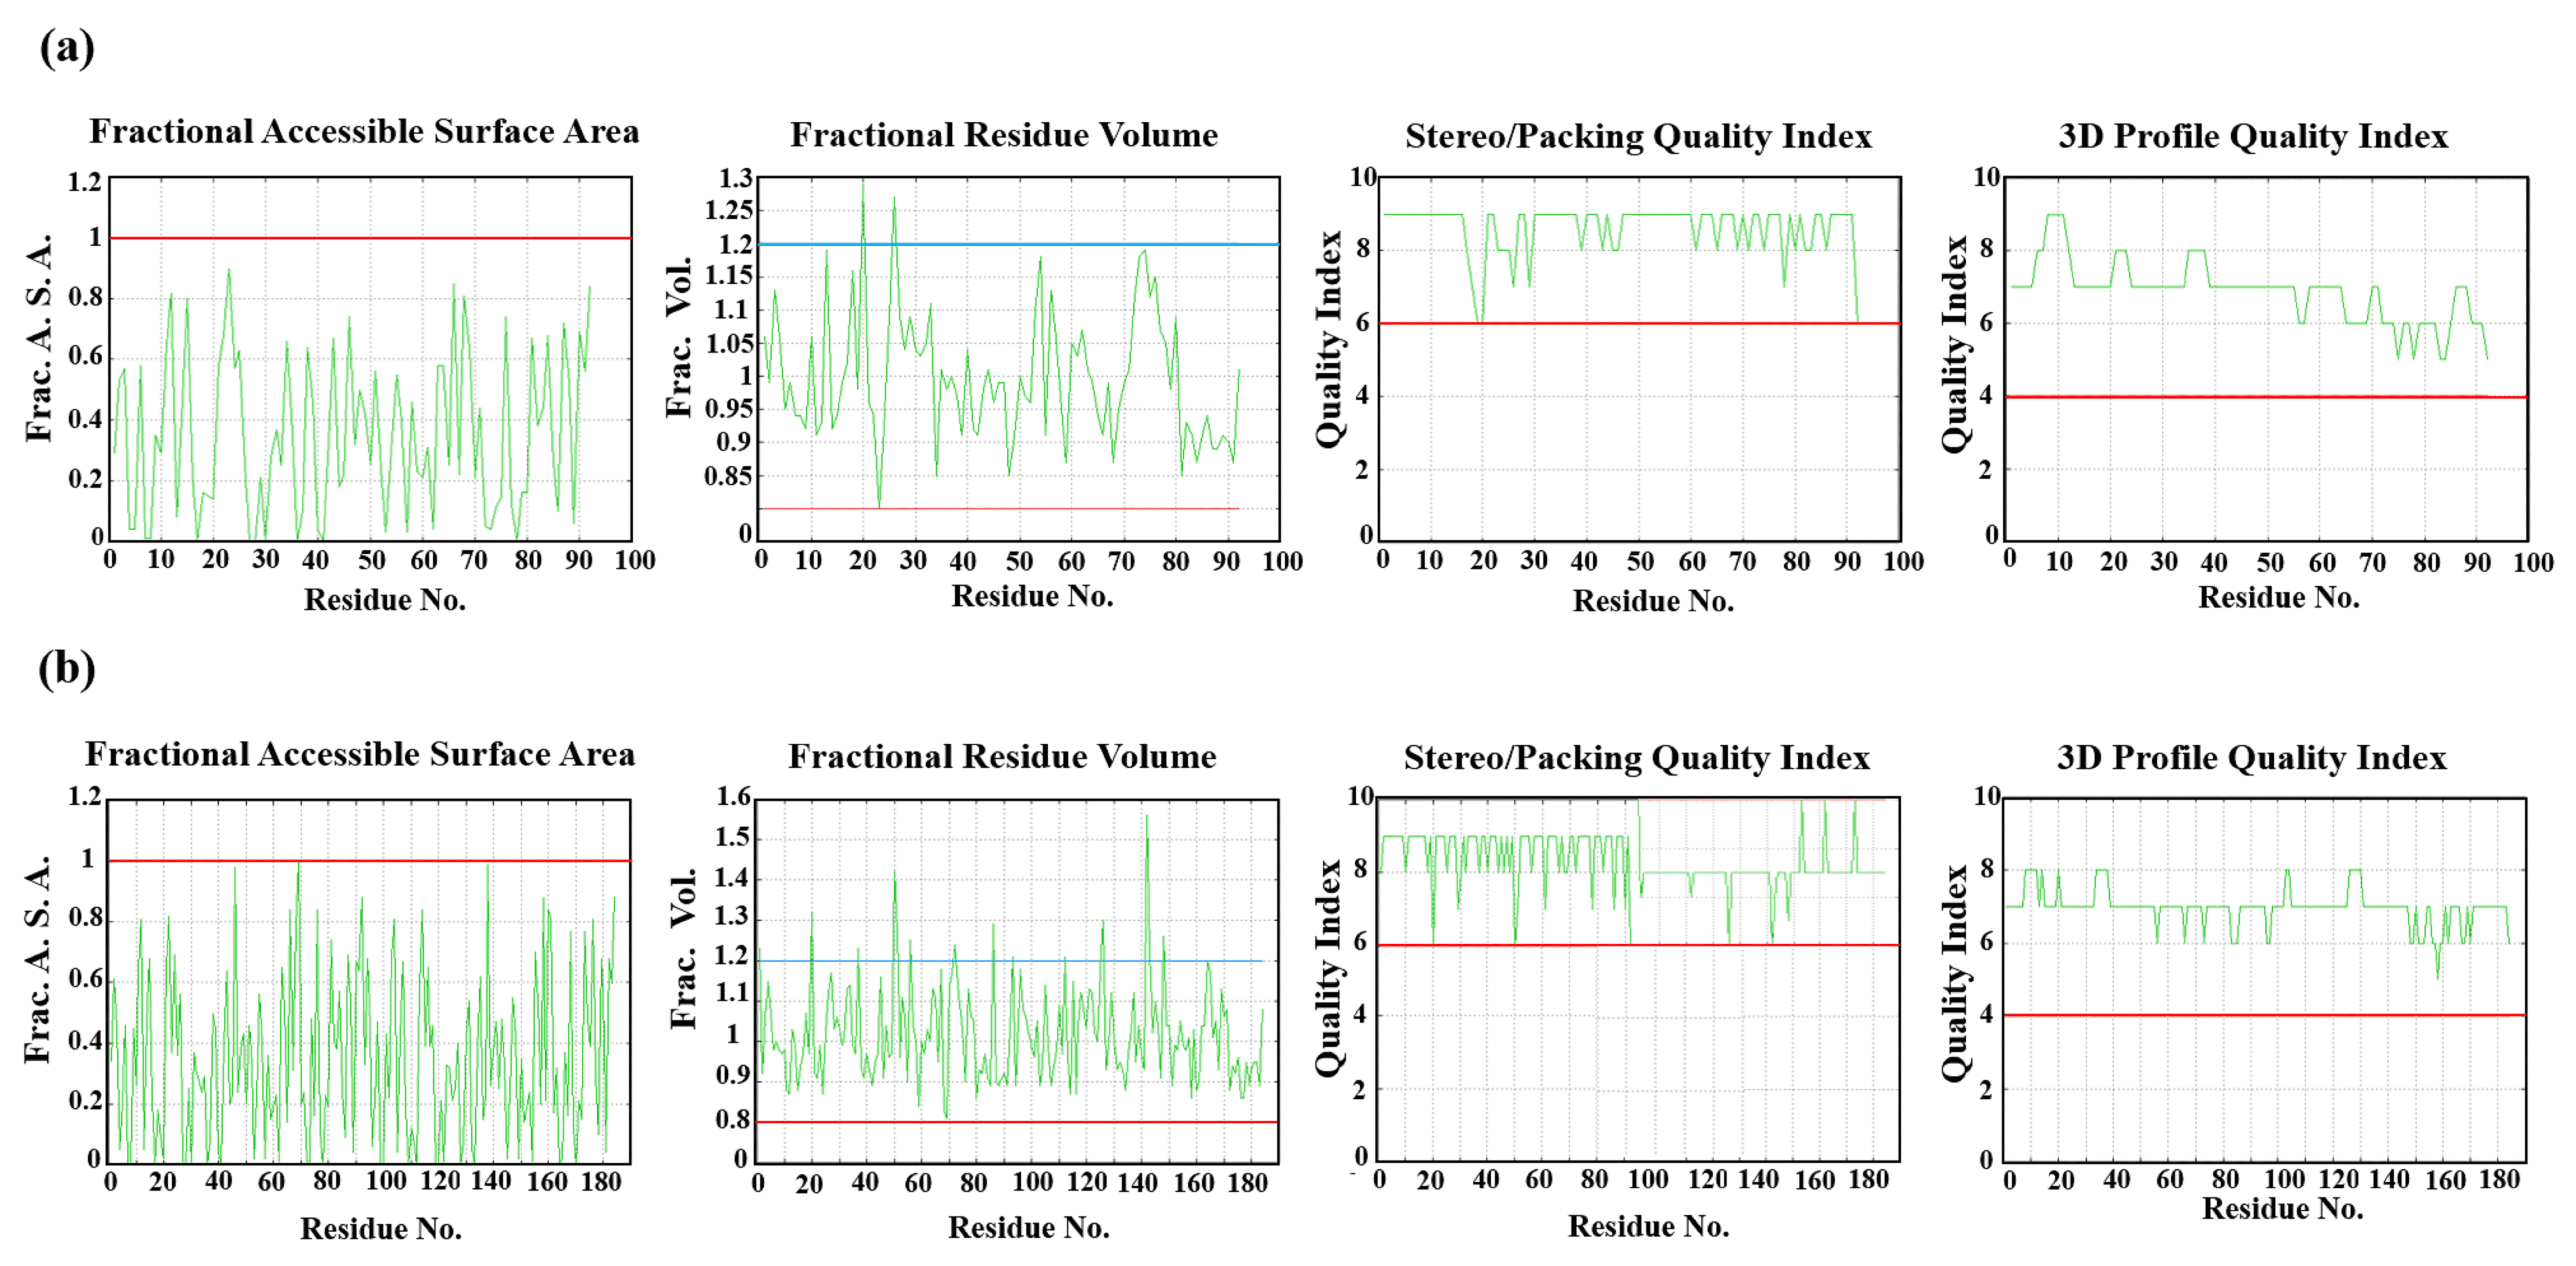

Supplement: Supplementary file 2 [file supplementary › Supplementary Figure 2.png]
